# Supplementary material
Source: publisher figshare collection journal article supplement (https://acs.figshare.com/ndownloader/files/3740785)
Supplement: Supplementary file 1 [file 3740785]

## Supporting information

### **High Power Efficiency Solution-Processed Blue Phosphorescent OLEDs Using Exciplex-Type Host with a Turn-on Voltage Approaching the Theoretical Limit**

Xinxin Ban<sup>†</sup>, Kaiyong Sun<sup>†</sup>, Yueming Sun<sup>\*†</sup>, Bin Huang<sup>†</sup>, Shanghui Ye<sup>\*‡</sup>, Min Yang<sup>‡</sup>, and Wei Jiang<sup>\*†</sup>

<sup>†</sup> School of Chemistry and Chemical Engineering, Southeast University, Nanjing, Jiangsu, P. R. China 211189

<sup>‡</sup> National Synergistic Innovation Center for Advanced Materials, Nanjing University of Posts and Telecommunications, Nanjing, P. R. China, 210023

<sup>\*</sup>E-mail: jiangw@seu.edu.cn (W. Jiang), sun@seu.edu.cn (Y.M. Sun), iamshye@njupt.edu.cn (S.H. Ye).

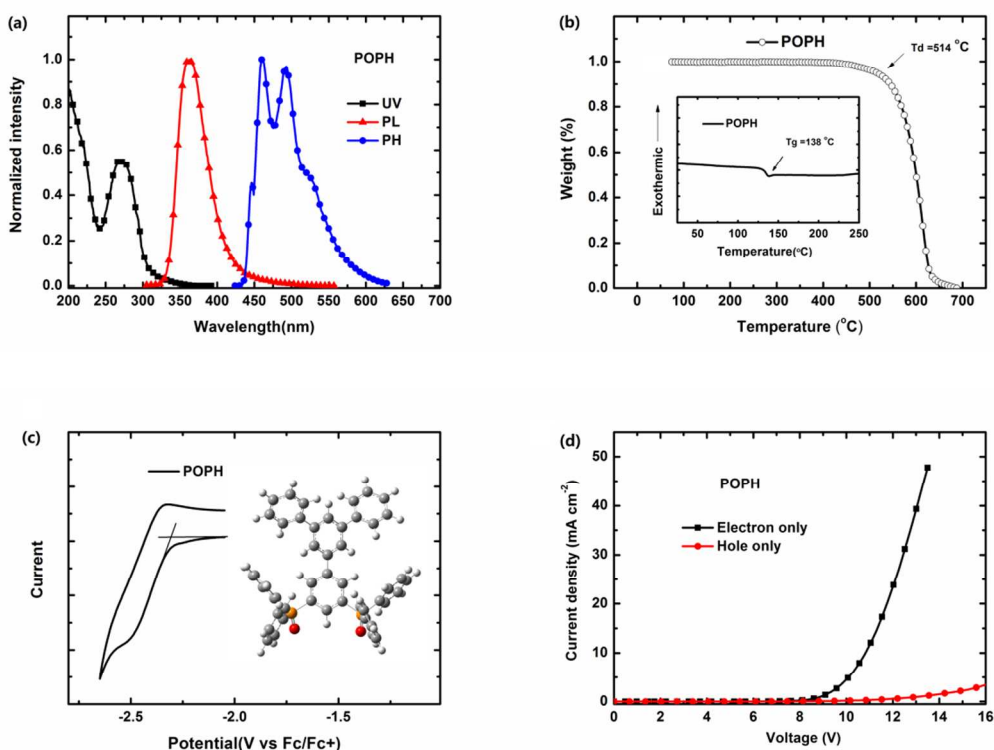

Figure S1. Physical properties of the electron-transporting material POPH. a) UV-Vis absorption, fluorescence and phosphorescence spectra of the spin-coated POPH film. b) TGA curve of POPH recorded at a heating rate of 10 °C min<sup>-1</sup>. Inset: DSC trace recorded at a heating rate of 10 °C min<sup>-1</sup>. c) Cyclic voltammogram of POPH in acetonitrile for reduction. Inset: Optimized space geometry for POPH. d) Current density-voltage (J-V) curves of hole- and electron-only devices based on POPH. The structure for hole-only device was ITO/PEDOT:PSS/POPH (60 nm)/Al, and the structure for electron-only device was ITO/POPH (60 nm)/TPBI (30 nm)/Ca (10nm)/Ag.

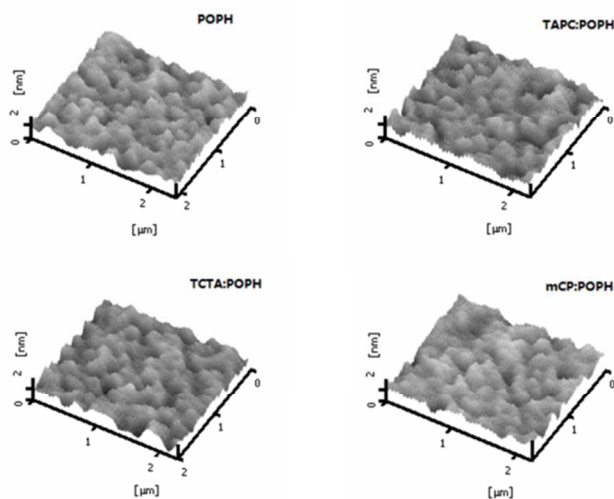

Figure S2. AFM topographic images of POPH, TAPC:POPH, TCTA:POPH and mCP:POPH.

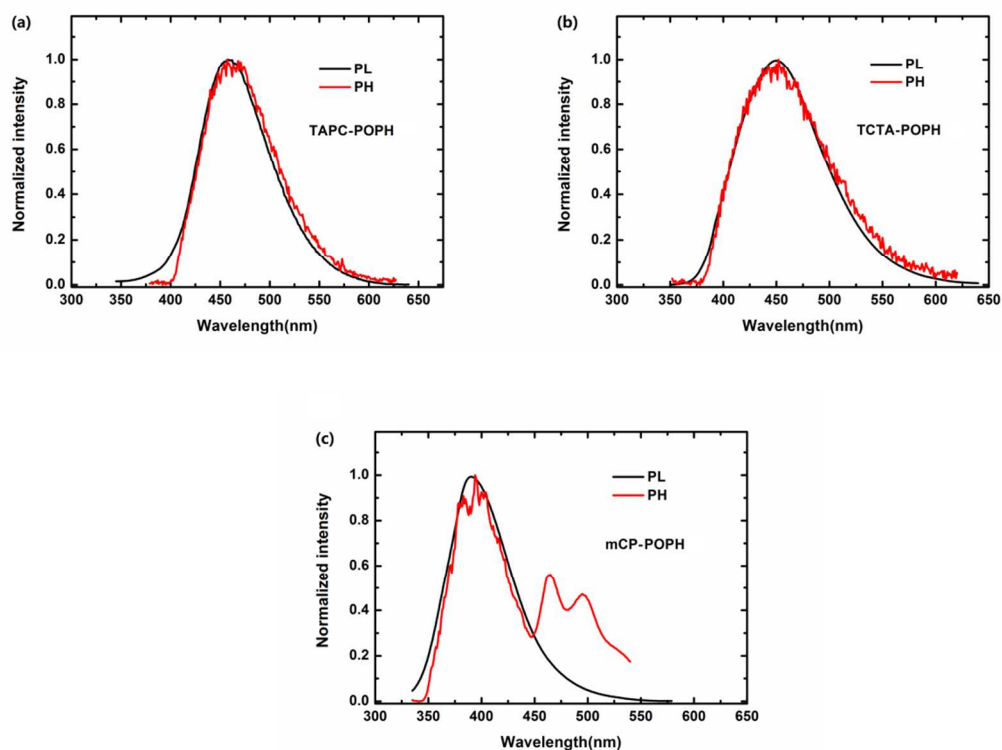

**Figure S3.** Fluorescence and phosphorescence spectra of mixed films at 77 K. (a) TAPC:POPH. (b) TCTA:POPH. (c) mCP:POPH.

**Table S1.** Photophysical properties of the exciplex emitters and their constituting molecules.

|           | $\lambda_{\max}$<br>[nm] <sup>a</sup> | FWHM<br>[nm] <sup>b</sup> | $S_1$<br>[eV] <sup>c</sup> | $T_1$<br>[eV] <sup>c</sup> | $\Delta E_{ST}$<br>[eV] <sup>d</sup> | HOMO/ LUMO<br>[eV] <sup>e</sup> | $\tau$<br>[ns] <sup>a</sup> |
|-----------|---------------------------------------|---------------------------|----------------------------|----------------------------|--------------------------------------|---------------------------------|-----------------------------|
| TAPC      | 375                                   | 43                        | 3.59 <sup>e</sup>          | 2.98 <sup>e</sup>          | 0.61                                 | -5.6/-2.0                       | 2.5 (53%), 6.3 (47%)        |
| TCTA      | 392                                   | 47                        | 3.21 <sup>e</sup>          | 2.85 <sup>e</sup>          | 0.36                                 | -5.8/-2.4                       | 2.3 (100%)                  |
| mCP       | 365                                   | 54                        | 3.49 <sup>e</sup>          | 3.00 <sup>e</sup>          | 0.49                                 | -6.1/-2.4                       | 3.5 (100%)                  |
| POPH      | 363                                   | 46                        | 3.41 <sup>e</sup>          | 2.78 <sup>e</sup>          | 0.65                                 | -6.7/-2.5                       | 20 (100%)                   |
| TAPC:POPH | 460                                   | 82                        | 2.69                       | 2.64                       | 0.059                                | -/-                             | 4.4 (12%), 135 (88%)        |
| TCTA:POPH | 448                                   | 95                        | 2.75                       | 2.72                       | 0.038                                | -/-                             | 20 (23%), 150 (77%)         |
| mCP:POPH  | 392                                   | 72                        | 3.15                       | 3.10                       | 0.051                                | -/-                             | 16 (38%), 80 (62%)          |

<sup>a</sup> Measured in deposited films at 300 K. <sup>b</sup> The full width at half maximum (FWHM) of the emission spectra. <sup>c</sup> Estimated from high-energy peaks of film-state fluorescence and phosphorescence spectra at 77 K. <sup>d</sup> The difference between  $S_1$  and  $T_1$ . <sup>e</sup> Obtained from the reference.

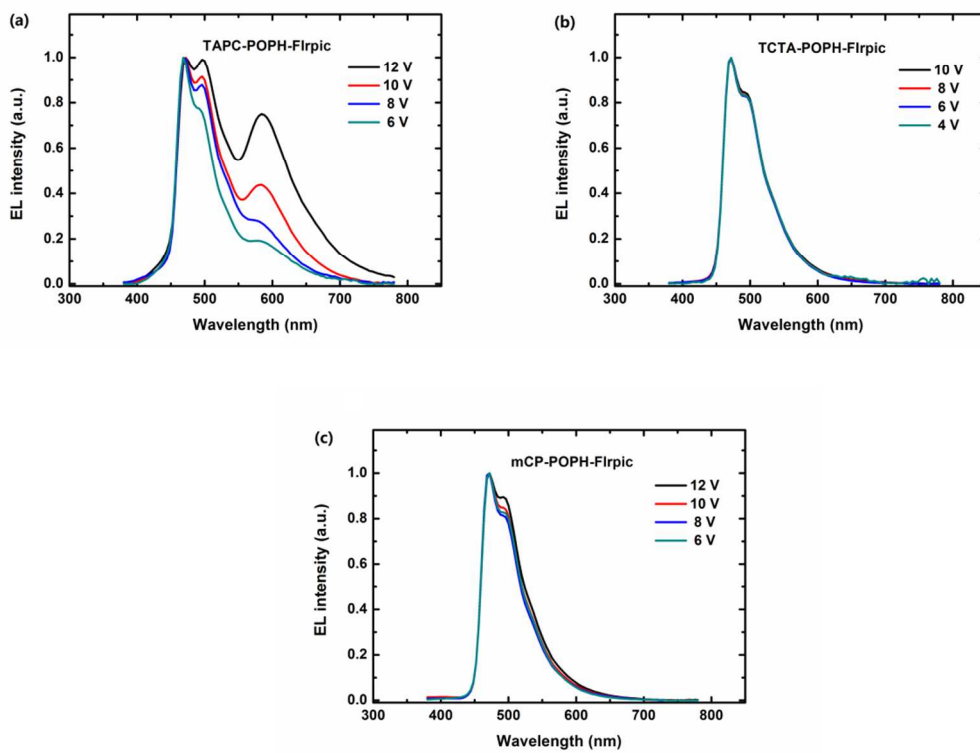

**Figure S4.** Electroluminescence spectra of the (a) TAPC-POPH-FIrpic, (b) TCTA-POPH-FIrpic and (c) mCP-POPH-FIrpic based devices at different voltages.
